# Supplementary material for: Hierarchical ultrathin defect-rich CoFe2O4@BC nanoflowers synthesized via a temperature-regulated strategy with outstanding hydrogen evolution reaction activity
Source: Royal Society of Chemistry journal article supplement (doi:10.1039/d0qi01346c), 2021-01-01
Supplement: d0qi01346c1.pdf [file d0qi01346c1.pdf]

# Hierarchical ultrathin defect-rich $\text{CoFe}_2\text{O}_4@\text{BC}$ nanoflowers synthesized via temperature-regulated strategy for an outstanding hydrogen evolution reaction

Bashir Adegbemiga Yusuf<sup>a</sup>, Meng Xie<sup>b\*</sup>, Waleed Yaseen<sup>a</sup>, Jimin Xie<sup>a</sup>, Yuanguo Xu<sup>a\*</sup>

<sup>a</sup> School of Chemistry and Chemical Engineering, Jiangsu University, Zhenjiang 212013, China

<sup>b</sup> School of Pharmacy, Jiangsu University, Zhenjiang, 212013, PR Chin

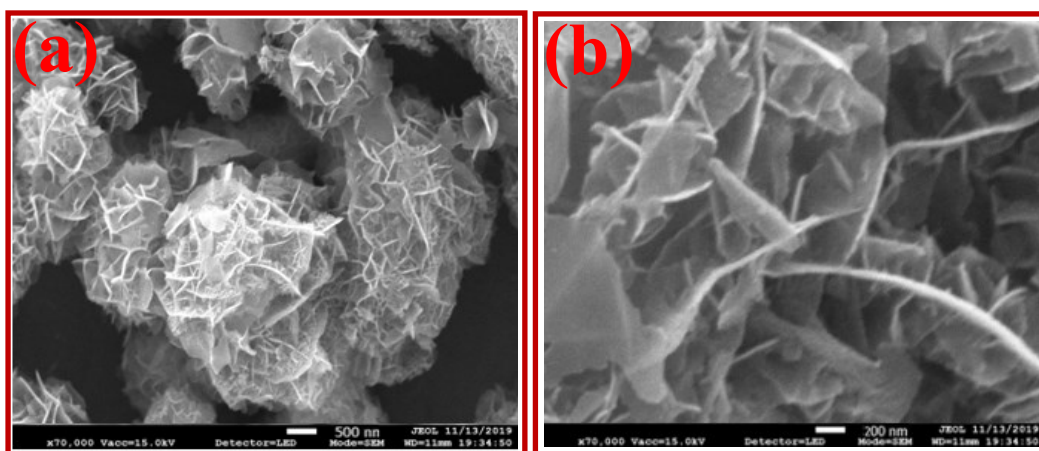

Fig S1. (a and b) SEM images of  $\text{CoFe}_2\text{O}_4@\text{BC}$  500°C

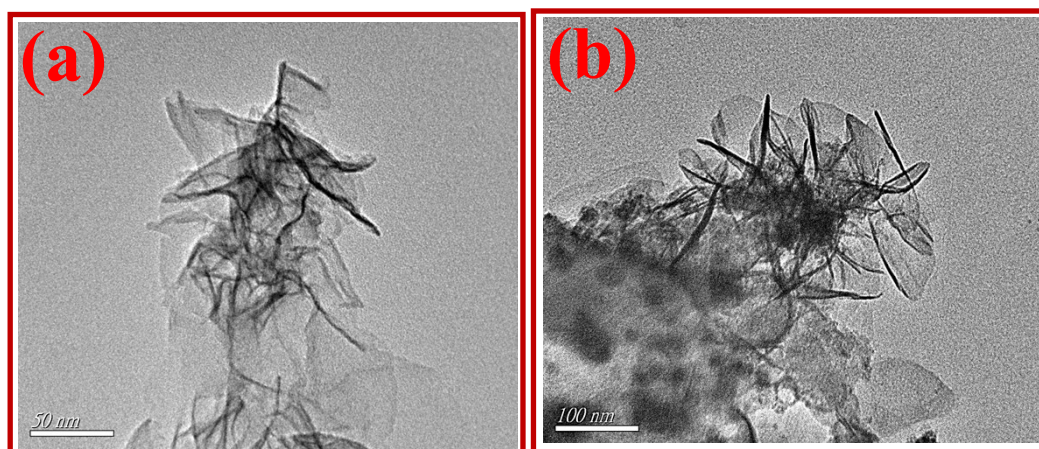

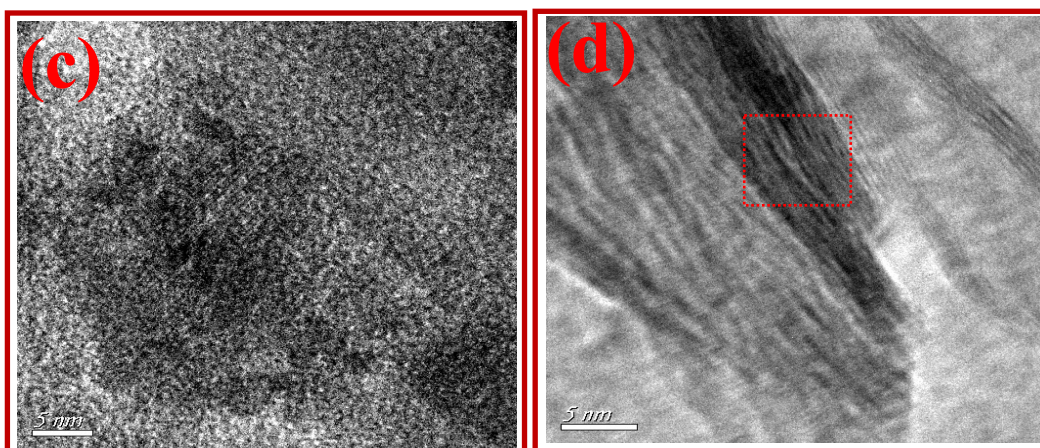

**Fig. S2.** (a-b) TEM images and (c and d) HR-TEM image of nanoflowers and the red region (*inset: carbon shell*) of the as-prepared  $\text{CoFe}_2\text{O}_4@\text{BC}$  500°C.

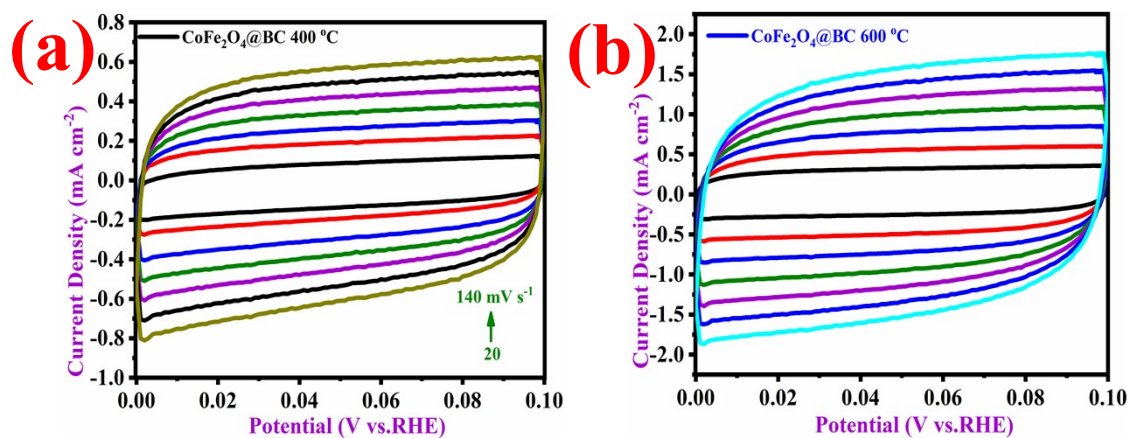

**Fig S3.** Cyclic voltammograms for (a)  $\text{CoFe}_2\text{O}_4@\text{BC}$  400°C and (b)  $\text{CoFe}_2\text{O}_4@\text{BC}$  600°C

**Table S1.** Overpotential at a current density 10 mA cm<sup>-2</sup> of the as-prepared CoFe<sub>2</sub>O<sub>4</sub>@BC 500°C and CoFe<sub>2</sub>O<sub>4</sub>@BC 600°C catalyst and other reported catalysts for HER.

| <b>Electrocatalyst</b>                                             | <b>Electrolyte</b> | <b><math>\eta_{10}</math> (mV)</b> | <b>Nanostructures</b> | <b>Synthetic routes</b>            | <b>Ref</b> |
|--------------------------------------------------------------------|--------------------|------------------------------------|-----------------------|------------------------------------|------------|
| CoFe <sub>2</sub> O <sub>4</sub> @BC 500°C                         | 1 M KOH            | 58                                 | Nanoflowers           | Chemical reduction and calcination | This work  |
| CoFe <sub>2</sub> O <sub>4</sub> @BC 600°C                         |                    | 82                                 |                       |                                    |            |
| NiCo <sub>2</sub> S <sub>4</sub> /CC                               | 1 M KOH            | 263                                | Nanosheet             | Hydrothermal treatment             | [1]        |
| Co-NRCNTs                                                          | 1 M KOH            | 270                                | Carbon nanotube       | Calcination process                | [2]        |
| NiCoP/NF                                                           | 1 M KOH            | 350                                | Nanocube              | Pyrolysis                          | [3]        |
| Ni@B-C 500°C                                                       | 1 M KOH            | 176                                | Nanosheet             | Calcination treatment              | [4]        |
| CoS <sub>2</sub> /CC                                               | 1 M KOH            | 462                                | Nanowire              | Hydrothermal method                | [5]        |
| Ni <sub>2</sub> / <sub>3</sub> Fe <sub>1</sub> / <sub>3</sub> -rGO | 1 M KOH            | 560                                | Nanosheet             | Homogeneous precipitation method   | [6]        |
| Ni <sub>3</sub> Fe@BC-500°C                                        | 1 M KOH            | 330                                | Nanoparticle          | Chemical reduction and pyrolysis   | [7]        |

|                   |                |            |                     |                                             |             |
|-------------------|----------------|------------|---------------------|---------------------------------------------|-------------|
| <b>Co-30Ni-B</b>  | <b>1 M KOH</b> | <b>170</b> | <b>Nanoparticle</b> | <b>Chemical<br/>reduction<br/>treatment</b> | <b>[8]</b>  |
| <b>Co-Ni-B@NF</b> | <b>1 M KOH</b> | <b>205</b> | <b>Nanoparticle</b> | <b>Electroless<br/>plating<br/>method</b>   | <b>[9]</b>  |
| <b>Co-B</b>       | <b>1 M KOH</b> | <b>250</b> | <b>Nanoparticle</b> | <b>Chemical<br/>reduction<br/>method</b>    | <b>[10]</b> |

## References

1. Y. Hou, M. Lohe, j. zhang, S. Liu, x. zhuang and X. Feng, Energy Environ. Sci 9 (2016) 478-483.
2. X. Zou, X. Huang, A. Goswami, R. Silva, B.R. Sathe, E. Mikmeková, T. Asefa, Cobalt-embedded nitrogen-rich carbon nanotubes efficiently catalyze hydrogen evolution reaction at all pH values, Angewandte Chemie International Edition 53(17) (2014) 4372-4376.
3. H. Liang, A.N. Gandi, D.H. Anjum, X. Wang, U. Schwingenschlögl, H.N. Alshareef, Plasma-assisted synthesis of NiCoP for efficient overall water splitting, Nano letters 16(12) (2016) 7718-7725.
4. Yusuf BA, Xu Y, Ullah N, Xie M, Oluigbo CJ, Yaseen W, et al. B-doped carbon enclosed Ni nanoparticles: A robust, stable and efficient electrocatalyst for hydrogen evolution reaction. Journal of Electroanalytical Chemistry. 2020:114085.

5. W. Fang, D. Liu, Q. Lu, X. Sun, A.M. Asiri, Nickel promoted cobalt disulfide nanowire array supported on carbon cloth: an efficient and stable bifunctional electrocatalyst for full water splitting, *Electrochemistry Communications* 63 (2016) 60-64.
6. W. Ma, R. Ma, C. Wang, J. Liang, X. Liu, K. Zhou, T. Sasaki, A superlattice of alternately stacked Ni-Fe hydroxide nanosheets and graphene for efficient splitting of water, *ACS nano* 9(2) (2015) 1977-1984.
7. Adegbemiga YB, Ullah N, Xie M, Hussain S, Oluigbo CJ, Yaseen W, et al. Ni<sub>3</sub>Fe nanoparticles enclosed by B-doped carbon for efficient bifunctional performances of oxygen and hydrogen evolution reactions. *Journal of Alloys and Compounds*. 2020:155267.
8. Gupta S, Patel N, Fernandes R, Kadrekar R, Dashora A, Yadav A, et al. Co-Ni-B nanocatalyst for efficient hydrogen evolution reaction in wide pH range. *Applied Catalysis B: Environmental*. 2016;192:126-33.
9. Xu N, Cao G, Chen Z, Kang Q, Dai H, Wang P. Cobalt nickel boride as an active electrocatalyst for water splitting. *Journal of Materials Chemistry A*. 2017;5:12379-84.
10. Gupta S, Patel N, Miotello A, Kothari D. Cobalt-boride: An efficient and robust electrocatalyst for hydrogen evolution reaction. *Journal of Power Sources*. 2015;279:620-5.
